# Supplementary material
Source: MDPI journal article supplement (https://www.mdpi.com/2076-3417/11/23/11238)
Supplement: s1 [file s1]

Archive with 3 entries (3 files):
- applsci-1408406-Table S1.xlsx
- applsci-1408406-Table S2.xlsx
- Supplementary figures.pdf
