# Supplementary material
Source: MDPI journal article supplement (https://www.mdpi.com/2076-3417/11/23/11238)
Supplement: s1 [file s1 › applsci-1408406-Table S1.xlsx]

## Sheet: CSCC raw
	preNIPP #1	preNIPP #2	preNIPP #3	preNIPP #4	preNIPP #5	preNIPP #6	postNIPP #1	postNIPP #2	postNIPP #3	postNIPP #4	postNIPP #5	postNIPP #6
Analyte	[AFI]	[AFI]	[AFI]	[AFI]	[AFI]	[AFI]	[AFI]	[AFI]	[AFI]	[AFI]	[AFI]	[AFI]
Akt substrates - phospho Ser/Thr	1253	1069	1407	1113	337	471	743	461	1403	969	872	518
alpha 1-Actin	160025	154127	156492	142506	145597	137172	157017	136307	144687	137105	128627	136276
ATM	247	220	189	193	55	196	174	199	197	224	197	74
Bax	725	749	662	785	644	746	721	819	513	869	719	639
Bcl-xL	7862	7674	7442	7768	6587	6911	7583	6407	6653	6784	8399	7068
Beclin-1	241	181	262	219	253	212	167	216	204	192	211	226
beta-Catenin	1569	1548	1637	1893	1616	1602	1278	1203	1400	1243	1266	1146
Caspase 3	5703	5251	6279	5440	4583	4321	5724	5055	5594	5177	4847	3533
Caspase 6	984	1006	1032	1079	732	743	1038	975	999	887	869	626
CDK2 - phospho Thr160	964	1147	934	986	957	982	1808	1510	1246	1750	1605	1224
CDK3	927	711			640	711					859
CDK5	2798	2567	2974	2836	2378	2273	2700	2201	2524	2268	2417	1816
c-Raf - phospho Ser259	1390	1544	1373	1337	1392	1076	1283	1268	1258	1259	1237	1140
Cyclin E1	90281	99691	95322	105715	86285	87260	91923	97491	104067	115081	99767	130181
Cytokeratin 18 (DC10)
Cytokeratin 5	10873	13828	10114	13411	10532	10858	10502	13073	11629	13504	12993	12135
Cytokeratin 8/18	442	582	987	774	363	405	586	649	857	804	356	315
DNA polymerase beta	4307	4068	4286	3985	3542	3445	4106	3528	3784	3809	3654	2783
E2F-2	6682	7835	7066	7546	6362	7479	6115	6486	5737	7096	7101	7872
E2F-4	68784	73089	68871	80525	66529	70107	72374	73798	73402	86245	81213	80115
ER
ER alpha	2625	2601	2672	2556	2525	5117	2423	2184	2005	2205	2780	2340
Erk1/2 (MAPK p44/42)	22981	19462	23653	21336	22719	20010	21709	18524	20805	18009	22604	14689
Erk1/2 (MAPK p44/42) - phospho Thr202/Tyr204	890	789	1291	1046	700	811	1422	1112	1654	1523	1350	769
FKBP12	18501	18346	14960	16009	8046	9809	23861	15369	17538	17727	16228	9746
GAPDH	129490	103137	159251	120157	122917	106580	119050	88316	117878	79429	112788	53460
GSK3 beta	2455	2417	2719	2321	2033	2169	2403	2082	2448	2476	2035	1514
Ku80	20560	24793	23579	26771	19796	21888	18063	22080	21767	25313	20678	17697
MEK1	1771	1358	1788	2079	1237	1505	2113	1790	3549	3030	2609	2683
MEK1/2 - phospho Ser217/Ser221	647	429	313	272	242	363	806	543	533	620	535	337
p21 (Waf1, Cip1, CDKN1A)	3685	3152	3670	3324	1896	2701	2299	1911	2013	2063	1856	1369
p38 MAPK	3455	3053	3700	3296	3536	3269	3161	2868	3012	2785	3178	2357
p38 MAPK - phospho Thr180/Tyr182		90	66	85		65	61	68	72	141	52
p53 - phospho Ser15
PTEN	742	707	921	880	828	737	725	690	771	751	786	567
PTEN - phospho Ser380	364	410	404	383	360	383	361	402	339	286	461	288
Rad52	359	360	239	310	174	164	417	380	348	331	318	236
Rb2 (p130)						55		125		73	76
S6 ribosomal protein	8278	8978	9972	11039	4958	5724	6657	5372	9996	7468	8962	6806
S6 ribosomal protein - phospho Ser235/Ser236	20184	17139	20959	14883	10285	12788	15427	11113	20772	17044	16178	11775
Src	13096	13327	11879	11863	14870	12141	10411	10286	9524	9251	11593	10765
Src - phospho Tyr527	3440	3547	3789	4392	3161	3281	4432	4599	4724	5040	4287	4050
Src family - phospho Tyr416			105		61	62	66		75	51	120	89
STAT 3	4357	4166	5016	4643	4275	4492	3334	3086	3659	3344	3435	2339
total protein 1	1112977	1115485	1227902	1185181	969977	1107619	1087755	1000271	1089400	1123957	1251539	1149775
total protein 2	1096263	1095815	1232277	1202392	948745	1086358	1070707	985136	1094306	1130283	1229059	1124305
total protein 3	1108078	1115817	1215814	1181681	960020	1084326	1086603	1000483	1078948	1117415	1237043	1132493

## Sheet: CSCC normalized
	preNIPP #1	preNIPP #2	preNIPP #3	preNIPP #4	preNIPP #5	preNIPP #6	postNIPP #1	postNIPP #2	postNIPP #3	postNIPP #4	postNIPP #5	postNIPP #6
Analyte	[AFI]	[AFI]	[AFI]	[AFI]	[AFI]	[AFI]	[AFI]	[AFI]	[AFI]	[AFI]	[AFI]	[AFI]
Akt substrates - phospho Ser/Thr	1254.85	1067.43	1271.59	1035.97	388.915	477.309	760.665	512.927	1428.61	954.792	779.251	505.173
alpha 1-Actin	160261	153900	141431	132643	168026	139009	160750	151660	147328	135095	114946	132901
ATM	247.365	219.676	170.811	179.642	63.4729	198.626	178.137	221.415	200.596	220.716	176.046	72.1676
Bax	726.071	747.897	598.289	730.668	743.209	755.993	738.142	911.251	522.365	856.258	642.524	623.177
Bcl-xL	7873.61	7662.7	6725.79	7230.36	7601.74	7003.58	7763.29	7128.68	6774.46	6684.53	7505.65	6892.98
Beclin-1	241.356	180.733	236.785	203.842	291.975	214.84	170.97	240.33	207.724	189.185	188.557	220.404
beta-Catenin	1571.32	1545.72	1479.46	1761.98	1864.95	1623.46	1308.38	1338.5	1425.56	1224.77	1131.34	1117.62
Caspase 3	5711.42	5243.27	5674.71	5063.48	5289.02	4378.88	5860.09	5624.39	5696.12	5101.09	4331.45	3445.51
Caspase 6	985.453	1004.52	932.681	1004.32	844.766	752.953	1062.68	1084.82	1017.24	873.994	776.57	610.499
CDK2 - phospho Thr160	965.424	1145.31	844.112	917.757	1104.43	995.154	1850.99	1680.08	1268.75	1724.34	1434.29	1193.69
CDK3	928.369	709.953			738.593	720.524					767.633
CDK5	2802.13	2563.22	2687.78	2639.71	2744.34	2303.45	2764.19	2448.92	2570.08	2234.75	2159.92	1771.03
c-Raf - phospho Ser259	1554.29	1379.96	1528.26	1258.42	1455.26	1192.77	1288.93	1049.22	1209.69	1066.13	840.018	700.22
Cyclin E1	1392.05	1541.73	1240.86	1244.46	1606.44	1090.41	1313.5	1410.83	1280.97	1240.54	1105.43	1111.77
Cytokeratin 18 (DC10)	90414.3	99544.2	86148.3	98398.2	99577.4	88428.9	94108.5	108472	105967	113394	89155.4	126957
Cytokeratin 5
Cytokeratin 8/18	10889.1	13807.6	9140.63	12482.8	12154.5	11003.4	10751.7	14545.5	11841.3	13306	11611	11834.5
DNA polymerase beta	4313.36	4062.01	3873.52	3709.19	4087.65	3491.15	4203.62	3925.39	3853.08	3753.15	3265.35	2714.09
E2F-2	6691.87	7823.46	6385.97	7023.72	7342.08	7579.18	6260.39	7216.58	5841.74	6991.95	6345.71	7677.07
E2F-4	68885.6	72981.4	62242.9	74951.7	76777.9	71046.1	74094.7	82110.5	74742	84980.4	72574.9	78131.1
ER
ER alpha	2628.88	2597.17	2414.85	2379.09	2913.98	5185.54	2480.61	2430	2041.6	2172.67	2484.31	2282.06
Erk1/2 (MAPK p44/42)	23014.9	19433.3	21376.6	19859.3	26218.9	20278	22225.1	20610.5	21184.8	17744.9	20199.7	14325.3
Erk1/2 (MAPK p44/42) - phospho Thr202/Tyr204	891.314	787.838	1166.75	973.604	807.836	821.864	1455.81	1237.25	1684.2	1500.67	1206.41	749.958
FKBP12	18528.3	18319	13520.3	14901	9285.5	9940.4	24428.3	17100.1	17858.2	17467.1	14501.9	9504.66
GAPDH	129681	102985	143925	111841	141853	108008	121880	98263.8	120030	78264.4	100791	52136.2
GSK3 beta	2665.93	2542.25	2339.84	2191.07	2536.61	2290.27	2410.99	2280.91	2343.01	2311.6	1883.78	1728.12
Ku80	20590.4	24756.5	21309.8	24918.1	22845.6	22181.2	18492.5	24567.1	22164.4	24941.8	18478.6	17258.8
MEK1	1773.62	1356	1615.92	1935.11	1427.56	1525.16	2163.24	1991.62	3613.79	2985.57	2331.5	2616.56
MEK1/2 - phospho Ser217/Ser221	647.956	428.368	282.877	253.174	279.281	367.863	825.163	604.163	542.731	610.909	478.095	328.655
p21 (Waf1, Cip1, CDKN1A)	3690.44	3147.36	3316.8	3093.94	2188.08	2737.18	2353.66	2126.25	2049.75	2032.75	1658.59	1335.1
p38 MAPK	3460.1	3048.5	3343.91	3067.88	4080.73	3312.79	3236.15	3191.05	3066.99	2744.16	2839.97	2298.63
p38 MAPK - phospho Thr180/Tyr182		89.8675	59.6482	79.1169		65.8707	62.4503	75.6594	73.3144	138.933	46.4691
p53 - phospho Ser15
PTEN	743.096	705.959	832.363	819.093	955.555	746.872	742.237	767.721	785.075	739.988	702.398	552.96
PTEN - phospho Ser380	364.538	409.396	365.119	356.492	415.459	388.13	369.583	447.281	345.189	281.806	411.966	280.868
Rad52	359.53	359.47	215.999	288.544	200.805	166.197	426.914	422.803	354.353	326.147	284.176	230.156
Rb2 (p130)						55.7368		139.08		71.9296	67.9163
S6 ribosomal protein	8290.23	8964.78	9012.3	10275	5721.79	5800.68	6815.27	5977.1	10178.5	7358.5	8008.77	6637.47
S6 ribosomal protein - phospho Ser235/Ser236	20213.8	17113.8	18941.9	13852.9	11869.4	12959.3	15793.8	12364.8	21151.2	16794.1	14457.2	11483.4
Src	13115.3	13307.4	10735.8	11041.9	17160.8	12303.6	10658.5	11444.6	9697.87	9115.36	10359.9	10498.4
Src - phospho Tyr527	3445.08	3541.78	3424.35	4088.02	3647.96	3324.95	4537.37	5117.03	4810.24	4966.1	3831.02	3949.71
Src family - phospho Tyr416			94.8949		70.3972	62.8305	67.5692		76.3692	50.2522	107.236	86.7961
STAT 3	4363.44	4159.87	4533.26	4321.65	4933.57	4552.17	3413.27	3433.6	3725.8	3294.97	3069.64	2281.08

## Sheet: FFPE raw
	preNIPP #1	preNIPP #5	preNIPP #2	preNIPP #3	preNIPP #4	postNIPP 0h #2	postNIPP 0h #3	postNIPP 0h #1	postNIPP 24h #1	postNIPP 24h #4	postNIPP 24h #2	postNIPP 24h #3
Analyte	[MFI]	[MFI]	[MFI]	[MFI]	[MFI]	[MFI]	[MFI]	[MFI]	[MFI]	[MFI]	[MFI]	[MFI]
Akt	165	287	101	100	90	69	190		104	144
Akt substrates - phospho Ser/Thr	6727	5804	6418	4809	4807	5104	6549	5302	12211	8229	4201	2831
alpha 1-Actin	332	682	77	65		296	1402	190	627	638	550
ATM					51
Bax	71	183			148	135	550	87	216	100	85
Bcl-xL		112								93
Beclin-1					60	56
beta-Catenin	429	1049	144	76	304	399	475	659	258	339
Caspase 3	242	385	57		209	447	949	414	482	225	244
Caspase 6		147					311	84	87
CDK2 - phospho Thr160									351		71	318
CDK3				82
CDK5		94	60									162
c-Raf - phospho Ser259	51					50	52
Cyclin E1	2031	630	433	750	95	221	1852	96	767	602	119
Cytokeratin 18 (DC10)	242	1291	654	105	78	3576	23404	3130	1556	1140
Cytokeratin 5	124287	256372	837	16487	75499	234826	8779	68158	2185	49780	9091	435
Cytokeratin 8/18		69				249	1682	169	98
DNA polymerase beta	425	654	265	177	327	370	1148	321	816	351	325
E2F-2	380	382	365	357	200	205	316	210	975	485	259	153
E2F-4		87		56
ER	67		55		63	55	108				56
ER alpha	18161	15977	18726	13840	13394	12387	17584	13899	37306	21121	16132	8564
Erk1/2 (MAPK p44/42)	732	1022	354	199	280	522	1739	473	1040	865	459	63
Erk1/2 (MAPK p44/42) - phospho Thr202/Tyr204	402	297	238	183	188	160	1527	221	635	335	315
FKBP12	613	1042	329	219	226	1862	8442	985	3452	888	1879	81
GAPDH		82					123		64
GSK3 beta	143	247	55	51	72	154	347	69	176	132
Ku80	234	326	147	125	160	178	537	282	487	438	124
MEK1			52						61
MEK1/2 - phospho Ser217/Ser221	61	55							51
p21 (Waf1, Cip1, CDKN1A)	74						61	50		77
p38 MAPK	235	317	130		85	174	631	184	427	314	302	92
p38 MAPK - phospho Thr180/Tyr182		102					67
p53 - phospho Ser15
PTEN	151	199	123	63		129	99	71	157	188
PTEN - phospho Ser380	61		79						86
Rad52	1399	2191	847	475	571	909	1569	843	1491	1067	695	204
Rb2 (p130)	1567	92	129	136			3313		690	127
S6 ribosomal protein							233		68		68
S6 ribosomal protein - phospho Ser235/Ser236	108	56					368		186		52
Src	191	456	192	70	158	95	231	105	187	169
Src - phospho Tyr527	136	134	133	53	68	52	101	58	76	86
Src family - phospho Tyr416		92									67
STAT 3		189					141	95	84	194	76
total protein 1	78461	126817	48129	33268	93606	71446	466078	65380	356541	74077	349718	56725
total protein 2	78125	125031	48209	35001	93228	70553	448714	64790	354835	74093	354842	57261

## Sheet: FFPE normalized
	preNIPP #1	preNIPP #5	preNIPP #2	preNIPP #3	preNIPP #4	postNIPP 0h #2	postNIPP 0h #3	postNIPP 0h #1	postNIPP 24h #1	postNIPP 24h #4	postNIPP 24h #2	postNIPP 24h #3
Analyte	[AFI]	[AFI]	[AFI]	[AFI]	[AFI]	[AFI]	[AFI]	[AFI]	[AFI]	[AFI]	[AFI]	[AFI]
Akt substrates - phospho Ser/Thr	6539.06	3490.58	10170.5	11024.9	3916.68	5448.55	1071.68	6185.04	2612.1	8472.5	916.184	3806.39
alpha 1-Actin	322.725	410.162	122.02	149.017		315.982	229.423	221.644	134.124	656.879	119.948
ATM												41.5542
Bax	69.0164	110.058			120.589	144.113	90.002	101.49	46.2054	102.959
Bcl-xL		67.3579							95.7519
Beclin-1					59.7803							48.8873
beta-Catenin	417.015	630.879	228.194	174.235	247.695	425.935	77.729	768.756	55.1897	349.031
Caspase 3	235.239	231.543	90.3267		170.291	477.175	155.294	482.951	103.106	231.658	53.2133
Caspase 6		88.4073				50.892		97.9901
CDK2 - phospho Thr160									75.0837			427.564
CDK3				187.99
CDK5		56.5325	95.0807								217.815
c-Raf - phospho Ser259	49.6295					53.6546
Cyclin E1	1974.26	378.888	686.166	1719.42	235.919	303.061	164.072	111.989	619.814			77.4048
Cytokeratin 18 (DC10)	235.497	781.106	1034.43	234.362	63.6152	3837.38	3898.43	3664	333.298	1172.38
Cytokeratin 5	120815	154185	1326.38	37797.5	61515.6	250678	1436.6	79509.7	467.401	51253	1982.63	584.875
Cytokeratin 8/18		41.7477				267.2	280.173	197.833
DNA polymerase beta	413.127	393.322	419.94	405.784	266.436	394.977	187.859	374.462	174.554	361.386	70.8783
E2F-2	369.384	229.739	578.408	818.445	218.839	51.7102	208.566	244.975	499.352	56.4846	205.715	162.958
E2F-4		52.3227		128.384
ER	65.1995		86.9936		51.3815	59.0201
ER alpha	17673	9666.72	29619	30891.2	10923.9	13292.4	2928.99	16270.3	7991.01	21720.8	3488.93	11448.5
Erk1/2 (MAPK p44/42)	711.55	614.641	560.976	456.22	228.141	557.238	284.57	551.778	222.47	890.596	100.102	84.706
Erk1/2 (MAPK p44/42) - phospho Thr202/Tyr204	390.769	178.619	377.154	419.539	153.18	170.801	249.878	257.807	135.835	344.913	68.6975
FKBP12	596.527	630.451	520.38	488.813	184.321	1998.1	1406.19	1153.05	739.425	913.219	406.379	108.282
GAPDH		49.3156
GSK3 beta	139.157	149.445	86.9936	113.833	58.7217	165.256	57.8002	80.7719	37.6995	135.749
Ku80	227.463	196.06	232.948	286.57	130.366	190.016	87.8747	328.967	104.176	450.961
MEK1			82.2485
MEK1/2 - phospho Ser217/Ser221	59.3607	33.2772
p21 (Waf1, Cip1, CDKN1A)	71.9326							58.3275		79.2785
p38 MAPK	228.435	190.647	206.008		69.2569	185.746	103.257	214.645	91.3411	323.292	65.8623	123.698
p38 MAPK - phospho Thr180/Tyr182		61.714
p53 - phospho Ser15	65.1282
PTEN	146.942	120.403	194.549	140.617		138.429		83.1131	33.6297	193.339
PTEN - phospho Ser380	59.3607		124.954
Rad52	1360	1318	1342	1089	465	970	257	983	319	1099	152	274
Rb2 (p130)	1523.22	55.3297	204.424	311.789		542.139	147.6		130.758
S6 ribosomal protein							38.8111
S6 ribosomal protein - phospho Ser235/Ser236	105.098	33.8822					61.2982		39.8415
Src	185.867	275.898	303.687	156.242	128.862	101.944	38.4779	122.914	40.0557	173.8
Src - phospho Tyr527	132.345	81.0753	210.366	118.297	55.4594	55.8008		67.8952		88.4424
Src family - phospho Tyr416		55.6636
STAT 3		114.352						111.208		199.51
