# Supplementary material
Source: MDPI journal article supplement (https://www.mdpi.com/2076-3417/11/23/11238)
Supplement: s1 [file s1 › applsci-1408406-Table S2.xlsx]

## Sheet: Tabelle1
01 Antigen	02 Mod-Site	03 Supplier	04 Product No.
Bax		Cell Signaling	2772
p53 - phospho	Ser15	Cell Signaling	9284
Actin1 alpha		biorbyt	orb163571
ATM - phospho	Ser1981	Cell Signaling	5883
GADD45 alpha		Cell Signaling	4632
Caspase 3		Cell Signaling	9662
Histone H3 - phospho	Ser10	Cell Signaling	9701
GADD45B		abcam (Epitomics)	ab128920 (5833-1)
GSK3 beta		Cell Signaling	9315
Bcl-xL		Cell Signaling	2764
ATM		Cell Signaling	2873
Akt		Cell Signaling	4685
beta-Catenin		Cell Signaling	8480
Erk1/2 (MAPK p44/42)		Cell Signaling	4695
PTEN - phospho	Ser380	Cell Signaling	9551
GAPDH		Cell Signaling	5174
p38 MAPK		Cell Signaling	9212
Akt - phospho	Thr450	Cell Signaling	12178
p53		Cell Signaling	9282
Erk1/2 (MAPK p44/42) - phospho	Thr202/Tyr204	Cell Signaling	9101
HSP 27		Cell Signaling	2402
53BP1 - phospho	Ser25	Santa Cruz	sc-135748
cdc2 (CDK1)		Cell Signaling	9112
BRCA1		Cell Signaling	14823
DNA-PK		Cell Signaling	4602
Rad50		Cell Signaling	3427
DNA polymerase beta		abcam (Epitomics)	ab175197 (8220-1)
BRCA2		Cell Signaling	9012
53BP1 - phospho	Ser1618	Cell Signaling	6209
PPAR alpha		abcam	ab8934
Apaf-1		Cell Signaling	8723
Caspase 3 - cleaved	Asp175	Cell Signaling	9661
Rad52		Cell Signaling	3425
Caspase 6 - cleaved	Asp162	Cell Signaling	9761
BRCA1 - phospho	Ser1524	Cell Signaling	9009
Rad51		Epitomics	3161-1
ER alpha (estrogen receptor alpha)		Santa Cruz	sc-7207
cdc2 (CDK1) - phospho	Tyr15	Cell Signaling	4539
ATR		Cell Signaling	2790
Caspase 6		Cell Signaling	9762
Histone H3 - acetyl	Lys9	Cell Signaling	9649
ATR - phospho	Ser428	Cell Signaling	2853
CDK4		Cell Signaling	12790
CDK4 - phospho	Thr172	Invitrogen	PA-64482
Progesterone Receptor A/B		Cell Signaling	8757
53BP1		Cell Signaling	4937
HSP70		Cell Signaling	4876
Cyclin D1		Cell Signaling	2978
ER (estrogen receptor)		Thermo Scientific	RM-9101-S
Androgen receptor (AR)		Cell Signaling	5153
BID		Cell Signaling	2006
Survivin		Cell Signaling	2802
DFF45		Transduction Laboratories	D76320 (neu: BD #611036)
Cyclin E1		Cell Signaling	4129
Src		Cell Signaling	2109
Rb - phospho	Ser780	Cell Signaling	3590
cdc25A (M-phase inducer phosphatase 1)		abm	Y021163
cdc25A (M-phase inducer phosphatase 1) - phospho	Ser75	abm	Y011138
FoxM1		Cell Signaling	5436
Bad		Cell Signaling	9239
Bad - phospho	Ser112	Cell Signaling	5284
Bim - phospho	Ser69	Cell Signaling	4585
PARP - cleaved	Asp214	Cell Signaling	9541
p53 - phospho	Ser20	Cell Signaling	9287
E2F-2		Millipore	DR1095-100UG
Caspase 9 - cleaved	Asp330	Cell Signaling	7237
Cyclin B1		abcam (Epitomics)	ab32053 (1495-1)
PARP		Cell Signaling	9532
p27 (Kip1, CDKN1B) - phospho	Thr187	ABM	Y011208
Caspase 9		Cell Signaling	9502
Cytokeratin 8 - phospho	Ser23	Epitomics	2147-1
Bim		Cell Signaling	2819
Rb		Cell Signaling	9313
p21 (Waf1, Cip1, CDKN1A)		Cell Signaling	2947
FKBP12		abcam	ab58072
Src - phospho	Tyr527	Cell Signaling	2105
Cytokeratin 8		Santa Cruz	sc-52324
Cytokeratin 8/18		Cell Signaling	4546
p27 (Kip1, CDKN1B)		Cell Signaling	3698
p21 - phospho	Thr145	ThermoFisher	PA5-36677
Src family - phospho	Tyr416	Cell Signaling	6943
Cyclin E1 - phospho	Thr62	Cell Signaling	4136
Mre11 - phospho	Ser676	Cell Signaling	4859
Mre11		Cell Signaling	4847
p95 (NBS1) - phospho	Ser343	Cell Signaling	3001
Ku80		Cell Signaling	2180
Bcl2 - phospho	Ser70	Cell Signaling	2827
Survivin - phospho	Thr34	Cell Signaling	8888
Bcl2		Cell Signaling	4223
CDK2 - phospho	Thr160	Cell Signaling	2561
CDK6		Cell Signaling	13331
CDK6 - phospho	Tyr24	biorbyt	orb15014
CDK2		Cell Signaling	2546
MDM2		Santa Cruz	sc-965
Bax		Cell Signaling	2772
14-3-3 sigma		R&D	AF4424
MDM2 - phospho	Ser166	Cell Signaling	3521
Cyclin E1 - phospho	Thr62	Cell Signaling	4136
p53 - phospho	Ser15	Cell Signaling	9284
BRCA1		Cell Signaling	14823
Mre11 - phospho	Ser676	Cell Signaling	4859
p53 - acetyl	Lys382	Cell Signaling	2525
CBP		Cell Signaling	7389
Topo 2 alpha		Santa Cruz	sc-13058
p95 (NBS1) - phospho	Ser343	Cell Signaling	3001
Rb - phospho	Ser780	Cell Signaling	3590
FoxM1		Cell Signaling	5436
Apaf-1		Cell Signaling	8723
Bad		Cell Signaling	9239
Bad - phospho	Ser112	Cell Signaling	5284
Bim - phospho	Ser69	Cell Signaling	4585
E2F-2		Millipore	DR1095-100UG
BRCA1 - phospho	Ser1524	Cell Signaling	9009
p27 (Kip1, CDKN1B) - phospho	Thr187	ABM	Y011208
NF-κB p65		Epitomics	2229-1
NF-κB p65 - phospho	Ser468	Cell Signaling	3039
Rb		Cell Signaling	9313
CDK4 - phospho	Thr172	Invitrogen	PA-64482
NF-κB p100/p52	13	Cell Signaling	4882
Cyclin D1		Cell Signaling	2978
p21 (Waf1, Cip1, CDKN1A)		Cell Signaling	2947
p27 (Kip1, CDKN1B)		Cell Signaling	3698
p21 - phospho	Thr145	ThermoFisher	PA5-36677
p53		Cell Signaling	9282
CDK4		Cell Signaling	2906
p53 - phospho	Ser15	Cell Signaling	9286
Cytokeratin 18 (DC10)		Cell Signaling	4548
Src family - phospho	Tyr416	Cell Signaling	6943
CDK6 - phospho	Tyr13	biorbyt	orb15013
S6 ribosomal protein - phospho	Ser235/Ser236	Cell Signaling	2211
Histone H2B - acetyl	Lys20	Epitomics	1814-1
MEK1		Cell Signaling	9124
alpha 1-Actin		Sigma	A2066
PI3-kinase p85		Cell Signaling	4292
GSK3 beta		Cell Signaling	9315
E2F-4		biorbyt	orb10571
Histone deacetylase 3 (HDAC3)		Epitomics	1580-1
ATR - phospho	Ser428	Cell Signaling	2853
CDK5		Cell Signaling	2506
Beclin-1		Cell Signaling	3738
CDK3		abcam	ab135805
Rb2 (p130)		abcam (Epitomics)	ab76234 (2130-1)
PI3-kinase p85/p55 - phospho	p85 Tyr458/ p55 Tyr199	Cell Signaling	4228
c-Raf - phospho	Ser259	Cell Signaling	9421
Akt substrates - phospho	Ser/Thr	Cell Signaling	9611
PTEN		Cell Signaling	9552
c-Raf		Cell Signaling	9422
STAT 3		Cell Signaling	4904
4E-BP1		Epitomics	1557-1
Cytokeratin 5		Spring Bioscience	M3270
S6 ribosomal protein		Cell Signaling	2217
MEK1/2 - phospho	Ser217/Ser221	Cell Signaling	9154
FGF receptor 1		Cell Signaling	9740
p38 MAPK - phospho	Thr180/Tyr182	Cell Signaling	4511
