# Supplementary material
Source: MDPI journal article supplement (https://www.mdpi.com/2076-3417/11/23/11238)
Supplement: s1 [file s1 › Supplementary figures.pdf]

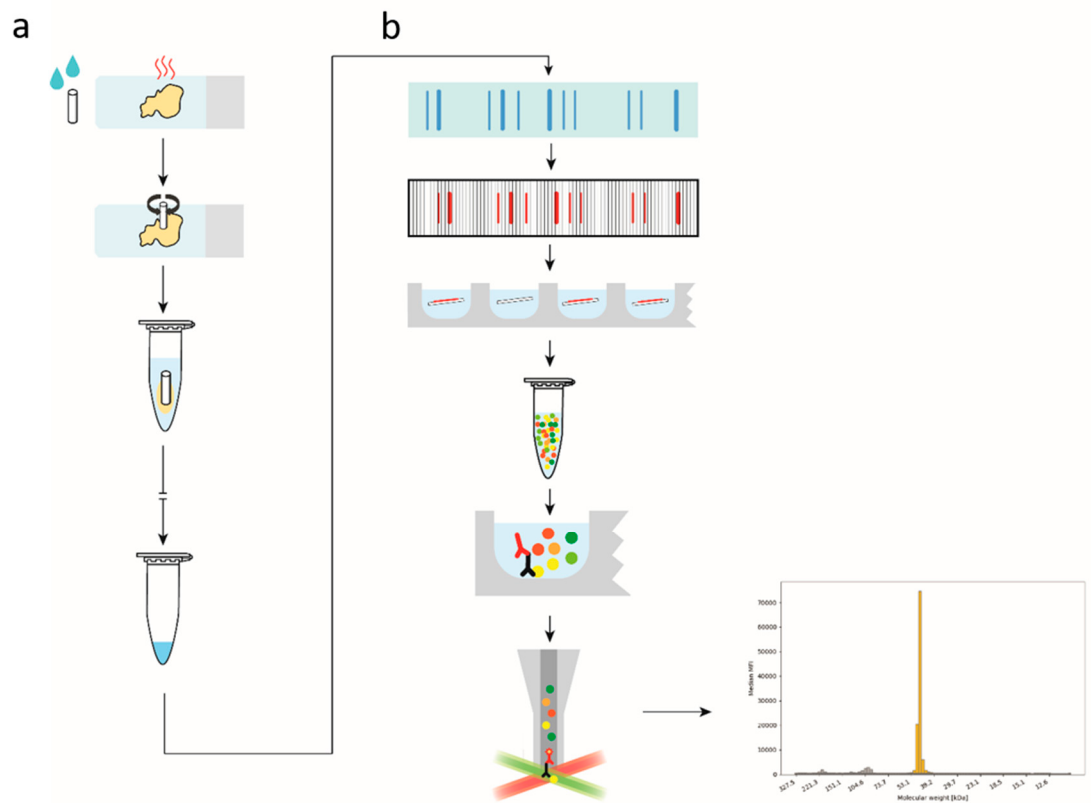

**Supplementary Figure S1.** Overview of FFPE extraction and DigiWest workflow. **(a)** Tissue picks are pre-wetted with extraction buffer and used to macro direct pre-heated FFPE slides. Samples are collected and transferred into a reaction tube. Protein extraction is performed according to the Qproteom FFPE tissue kit. **(b)** Proteins are separated through SDS-PAGE and transferred onto a membrane. Protein lanes are cut into 96 strips and sorted according to the molecular weight into a 96 well plate. Proteins are eluted and coupled onto magPlex beads of a distinct color ID and pooled together. An aliquot is used for primary and secondary antibody incubation and read-out is performed on a Luminex FlexMAP 3D. An excel macro-based algorithm is used to depict protein bands as peaks and for calculating the area of the peak.

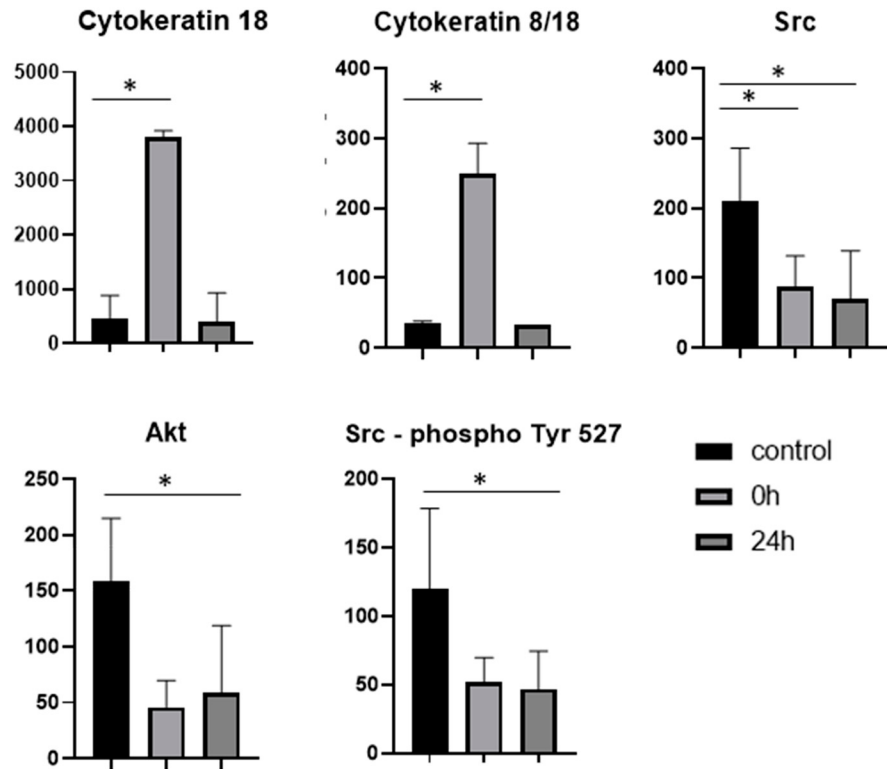

**Supplementary Figure S2.** Selected DigiWest results of control (untreated), 0 h and 24 h after treatment FFPE samples. Bar graphs for mean signals from selected proteins in control, 0 h and 24 h samples. Error bars indicate the standard derivation. ("\*" =  $p < 0.05$ ; Wilcoxon rank sum test).
